# Supplementary material for: Gait planning of a 4–5R rolling mechanism based on the planar 6R single-loop chain
Source: Copernicus journal article supplement (doi:10.5194/ms-15-633-2024), 2024-11-25
Supplement: Supplementary file 1 [file ms-15-633-2024-supplement.zip]

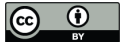

*Supplement of*

## **Gait planning of a 4–5R rolling mechanism based on the planar 6R single-loop chain**

**Qing Liu et al.**

*Correspondence to:* Qianqian Zhang ([zhang\\_qianqian@bjtu.edu.cn](mailto:zhang_qianqian@bjtu.edu.cn)) and Jialei Li ([624542637@sjtu.edu.cn](mailto:624542637@sjtu.edu.cn))

- [ms-15-633-2024-supplement-title-page.pdf](#)
- [Supplementary\\_Modification\\_Document](#)
  - [movie](#)
    - \* [Gait Planning of a 4-5R Rolling Mechanism Based on.mp4](#)

The copyright of individual parts of the supplement might differ from the article licence.
